# Supplementary material for: Sustained high blood pressure and 24-h ambulatory blood pressure monitoring in Tanzanian adolescents
Source: PubMed Central journal article supplement (PMC8052360; doi:10.1038/s41598-021-87996-0), 2021-04-16
Supplement: 41598_2021_87996_MOESM1_ESM.pdf [file 41598_2021_87996_MOESM1_ESM.pdf]

**Sustained High Blood Pressure and 24-Hour Ambulatory Blood Pressure Monitoring in  
Tanzanian Adolescents**

Mussa K. Nsanya<sup>1\*</sup>, Philip Ayieko<sup>1,2</sup>, Ramadhan Hashim<sup>1</sup>, Ezekiel Mgema<sup>1</sup>, Daniel Fitzgerald<sup>3</sup>, Saidi Kapiga<sup>1,2</sup>, Robert N. Peck<sup>1,3</sup>

<sup>1</sup>Mwanza Intervention Trials Unit / National Institute for Medical Research, Mwanza, Tanzania

<sup>2</sup>London School of Hygiene and Tropical Medicine, London, UK

<sup>3</sup>Weill Cornell Medical College, New York, USA

\***Corresponding Author:** Correspondence concerning, and reprints request of this article should be addressed to Mussa K. Nsanya, e-mail: [mussa.nsanya@mitu.or.tz](mailto:mussa.nsanya@mitu.or.tz).

**Supplementary Table: Distribution of ambulatory BP characteristic by gender among secondary school adolescents with sustained hypertension in Mwanza City, Tanzania (N=45).**

| Ambulatory BP Characteristic               | Males and Females (N=45)<br>N (%) or Mean (SD) | Males (N=20)<br>N (%) or Mean (SD) | Females (N=25)<br>N (%) or Mean (SD) | * P value |
|--------------------------------------------|------------------------------------------------|------------------------------------|--------------------------------------|-----------|
| Confirmed high BP (24 hour ABPM)           | 13 (29.0%)                                     | 5 (25.0%)                          | 8 (32.0%)                            | NS        |
| Average office systolic BP (mmHg)          | 125.9 (7.4)                                    | 127.4 (7.5)                        | 124.7 (7.2)                          | NS        |
| Average office diastolic BP (mmHg)         | 76.8 (6.7)                                     | 76.2 (6.1)                         | 77.3 (7.3)                           | NS        |
| Average office heart rate (bpm)            | 80.9 (16.9)                                    | 74.0 (13.0)                        | 86.4 (17.9)                          | 0.01      |
| 24-hour systolic ABPM (mmHg)               | 111.6 (6.7)                                    | 113.7 (8.2)                        | 110.0 (4.7)                          | NS        |
| 24-hour diastolic ABPM (mmHg)              | 64.8 (4.5)                                     | 64.8 (5.2)                         | 64.9 (3.8)                           | NS        |
| Asleep systolic ABPM (mmHg)                | 102.8 (7.4)                                    | 104.9 (9.2)                        | 101.2 (5.3)                          | NS        |
| Asleep diastolic ABPM (mmHg)               | 55.2 (4.8)                                     | 54.9 (5.6)                         | 55.4 (4.1)                           | NS        |
| Awake systolic ABPM (mmHg)                 | 117.3 (6.8)                                    | 119.5 (7.9)                        | 115.6 (5.4)                          | NS        |
| Awake diastolic ABPM (mmHg)                | 70.6 (5.9)                                     | 70.4 (7.3)                         | 70.8 (4.5)                           | NS        |
| Awake ABPM heart rate (bpm)                | 84.6 (12.3)                                    | 78.0 (11.0)                        | 90.0 (10.8)                          | 0.001     |
| Asleep ABPM heart rate (bpm)               | 68.3 (10.7)                                    | 62.8 (10.6)                        | 72.7 (8.6)                           | 0.001     |
| Heart rate non-dipper (< 10%)              | 2 (4.4)                                        | 1 (5.0)                            | 1 (4.0)                              | 0.01      |
| Systolic BP dip (%)                        | 12.4 (4.0)                                     | 12.3 (4.6)                         | 12.5 (3.6)                           | NS        |
| Diastolic BP dip (%)                       | 22.3 (5.7)                                     | 23.2 (6.3)                         | 21.5 (5.2)                           | NS        |
| Systolic BP non-dipper (<10%)              | 11 (24.4%)                                     | 5 (25.0%)                          | 6 (24.0%)                            | NS        |
| Diastolic BP non-dipper (<10%)             | 1 (2.2%)                                       | 0 (0.0%)                           | 1 (4.0%)                             | NS        |
| Combined BP non-dipper (<10%)              | 11 (24.4%)                                     | 5 (25.0%)                          | 6 (24.0%)                            | NS        |
| 24-hour systolic BP load (%)               | 12.5 (11.0)                                    | 13.5 (13.5)                        | 11.7 (8.6)                           | NS        |
| 24-hour diastolic BP load (%)              | 13.3 (10.2)                                    | 16.6 (12.9)                        | 10.7 (6.5)                           | NS        |
| Awake systolic BP load (%)                 | 14.6 (11.0)                                    | 14.7 (12.5)                        | 14.5 (9.8)                           | NS        |
| Awake diastolic BP load (%)                | 15.8 (11.9)                                    | 20.4 (14.7)                        | 12.1 (7.6)                           | 0.01      |
| Asleep systolic BP load (%)                | 9.5 (14.0)                                     | 12.1 (18.5)                        | 7.4 (8.8)                            | NS        |
| Asleep diastolic BP load (%)               | 9.7 (11.3)                                     | 11.7 (15.0)                        | 8.2 (7.2)                            | NS        |
| Morning BP surge (mmHg)                    | 21.3 (13.2)                                    | 20.6 (12.2)                        | 21.8 (14.1)                          | NS        |
| Ambulatory Arterial Stiffness Index (AASI) | 0.25 (0.12)                                    | 0.24 (0.13)                        | 0.26 (0.12)                          | NS        |

\* Student's t-test (continuous variable) and Fisher's exact test (categorical variable)  
NS – Not statistically significant (p > 0.01)
